# Supplementary material for: Macrophage-augmented intestinal organoids model virus-host interactions in enteric viral diseases and facilitate therapeutic development
Source: Springer Nature journal article supplement (doi:10.1038/s41467-025-59639-9), 2025-05-14
Supplement: MOESM1 [file 41467_2025_59639_MOESM1_ESM.pdf]

Supplementary information to

**Macrophage-augmented intestinal organoids model virus-host interactions in enteric viral diseases and facilitate therapeutic development**

*Guige Xu et al.*

## Supplementary Figure 1

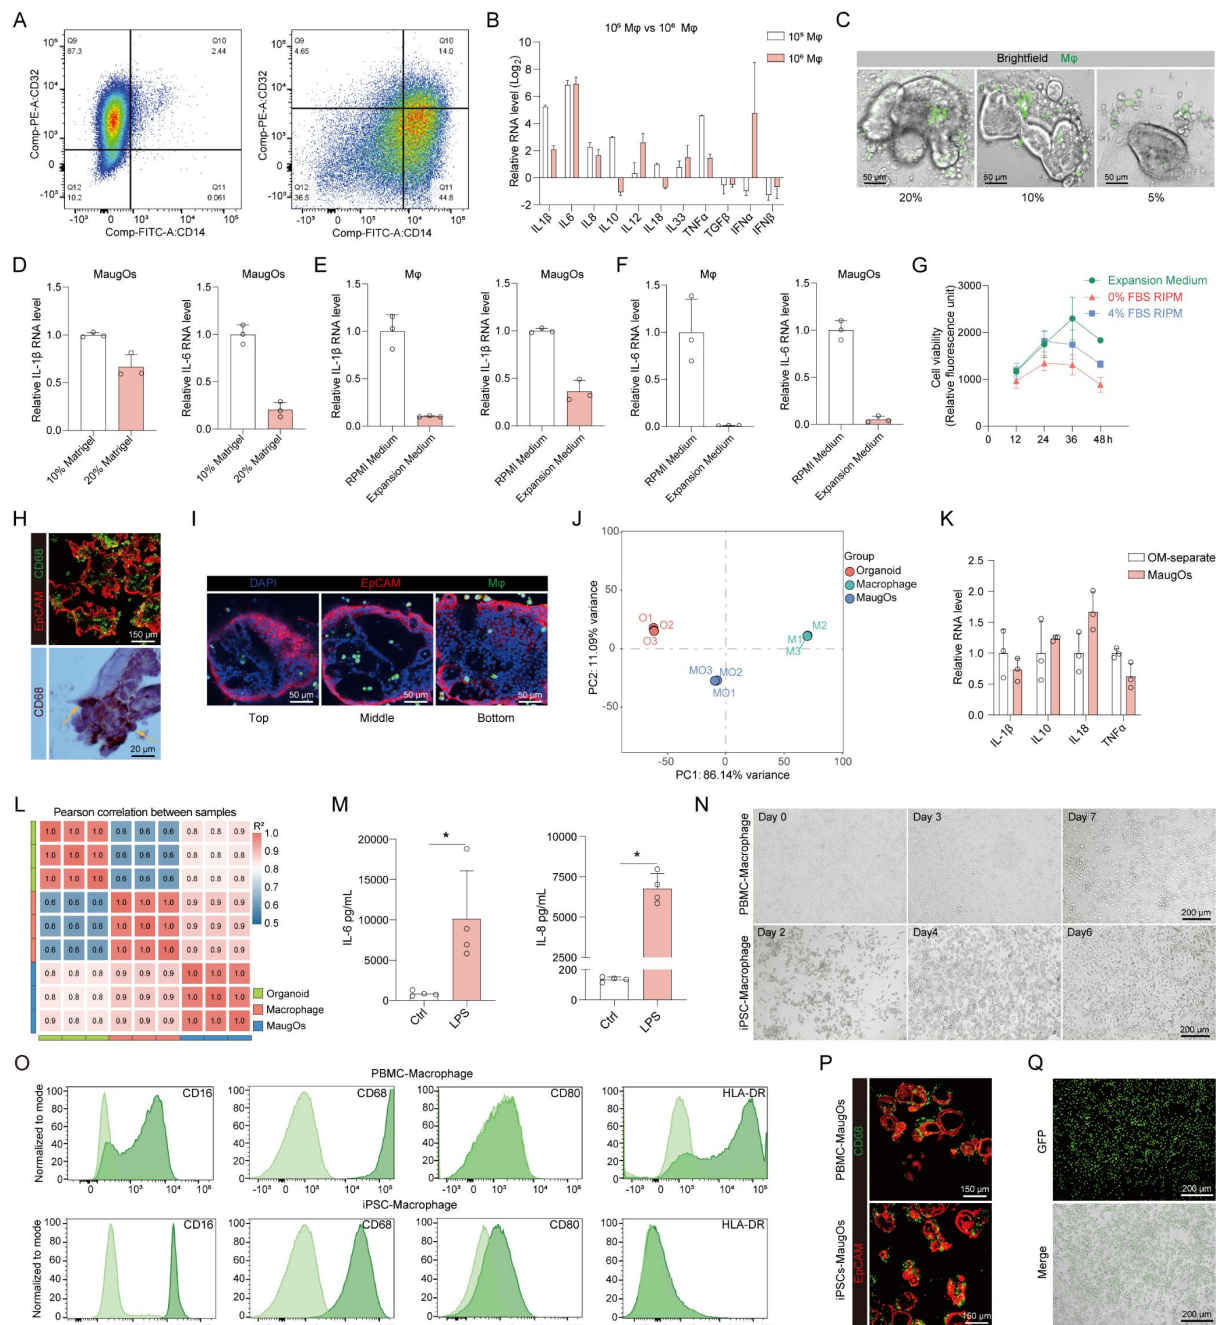

### Supplementary Figure 1. Establishment and characterization of macrophage-augmented intestinal organoids.

(A) FACS characterization of macrophages differentiated from THP-1 monocytes by measuring the expression of representative immune markers (CD32, CD14). The left image was for THP-1 monocytes and the right image was for THP-1 monocyte-differentiated macrophages.

(B) The expression of inflammatory genes in MaugOs incorporated with the number of 10<sup>5</sup> or 10<sup>6</sup> THP-1 derived macrophages upon stimulation of 1 µg/mL LPS for 12 hours. Each group was compared to its respective control without LPS treatment (n = 3).

(C) Morphological observation of MaugOs cultured in different concentrations of Matrigel.

(D) QRT-PCR quantification of IL-1β and IL-6 gene expression in LPS treated MaugOs cultured with different concentrations of Matrigel (n = 3).

(E to F) QRT-PCR quantification of IL-1 $\beta$  (E) and IL-6 (F) gene expression in LPS treated THP-1 macrophages and MaugOs using different culture medium (n = 3).

(G) Cell viability of MaugOs cultured in different medium for two days (n = 3). Relative fluorescence units were obtained at an excitation wavelength of 530 nm and an emission wavelength of 590 nm ( $\lambda_{Exc}$  530nm/ $\lambda_{Em}$  590nm).

(H) Immunofluorescence and immunohistochemistry (IHC) staining of MaugOs integrated THP-1 monocytes-derived macrophages. Epithelial membrane of organoids was stained by EpCAM (red); THP-1 monocytes-derived macrophages stained by CD68 (green) in Immunofluorescence panel. Yellow arrow indicates the macrophages of MaugOs stained by CD68 in IHC panel. Scale bar, 150  $\mu$ m and 20  $\mu$ m.

(I) Representative immunofluorescence staining images of MaugOs at different scanning layers. These images were related to MaugOs in Figure 1D. Scale bar, 50  $\mu$ m.

(J) Principal component analysis for genome-wide RNA sequencing of organoids, THP-1 macrophages and MaugOs (n = 3).

(K) Quantification of IL-1 $\beta$ , IL-10, IL-18, and TNF $\alpha$  gene expression in MaugOs compared to the expression in separately cultured organoids and THP-1 macrophages (n = 3). Note: For separately cultured organoids and macrophages, the lysed organoids and macrophages were combined for RNA isolation.

(L) Correlation matrix of transcriptomic profiles of macrophages, organoids and MaugOs (n = 3). A value of 1 represents complete correlation, and a value of 0 represents no significant correlation.

(M) Quantification of IL-6 and IL-8 protein production by ELISA in MaugOs integrated THP-1 monocytes-derived macrophages (n = 4).

(N) Bright field images of PBMC monocytes-derived and iPSCs-derived macrophages during the differentiation process. Scale bar, 200  $\mu$ m.

(O) FACS characterization of macrophages differentiated from PBMC- or iPSCs-monocytes by measuring the expression of representative immune markers (CD16, CD68, CD80 and HLA-DR).

(P) Immunofluorescence staining images of MaugOs integrated PBMC monocytes-derived macrophages and iPSCs-derived macrophages. Epithelial membrane of organoids was stained by EpCAM (red); PBMC monocytes-derived macrophages and iPSCs-derived macrophages stained by CD68 (green). Scale bar, 150  $\mu$ m.

(Q) Morphological observation of iPSCs-derived macrophages (Macrophages stably express GFP, green color). Scale bar, 200  $\mu$ m.

Data were presented as means of biological replicates  $\pm$  SEM. Statistical analysis was performed using the two-tailed Mann–Whitney test. \*p < 0.05.

## Supplementary Figure 2

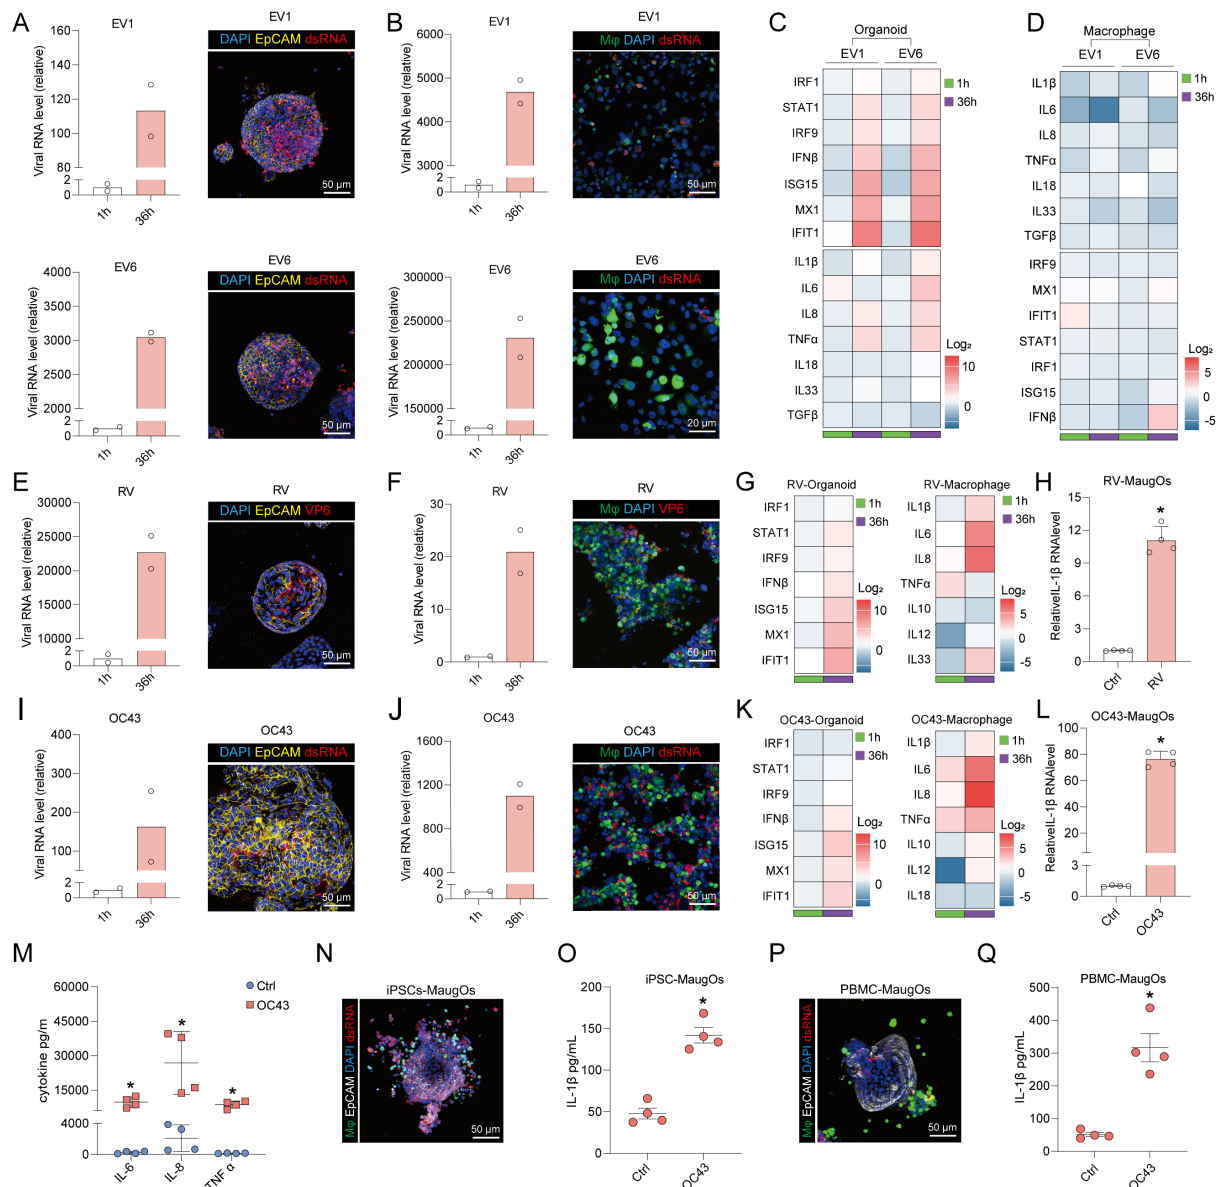

## Supplementary Figure 2. MaugOs recapitulate enteric viral infections and inflammatory response.

(A) QRT-PCR quantification of viral RNA level ( $n = 2$ ), and confocal imaging of viral replicating dsRNA (red) in intestinal organoids infected with EV1 and EV6 at 36 hours post-infection. The epithelial membrane of organoids was stained by EpCAM (yellow).

(B) QRT-PCR quantification of viral RNA level ( $n = 2$ ), and confocal imaging of viral replicating dsRNA (red) in THP-1 monocytes differentiated macrophages infected with EV1 and EV6. THP-1 macrophages were stained with CFSE (green).

(C-D) QRT-PCR quantification of inflammatory and antiviral associated genes expression in organoids (C) and THP-1 macrophages (D) upon the infection of EV1 and EV6 ( $n = 2-3$ ).

(E) QRT-PCR quantification of rotavirus RNA level ( $n = 2$ ) and confocal imaging of rotavirus VP6 protein (red) in intestinal organoids at 36 hours after rotavirus infection. Epithelial membrane of organoids was stained with EpCAM (yellow). Scale bar, 50  $\mu$ m.



(F) QRT-PCR quantification of rotavirus RNA level ( $n = 2$ ) and confocal imaging of rotavirus VP6 protein (red) in THP-1 macrophages at 36 hours after rotavirus infection. Scale bar, 50  $\mu\text{m}$ .

(G) QRT-PCR quantifying the expression of antiviral ISGs in organoids and inflammatory-associated genes in THP-1 macrophages triggered by rotavirus infection ( $n = 2-3$ ).

(H) QRT-PCR quantification of IL-1 $\beta$  gene expression in MavgOs at 36 hours after rotavirus infection ( $n = 4$ ).

(I) QRT-PCR quantification of OC43 RNA level ( $n=2$ ) and confocal imaging of viral replicating dsRNA (red) in intestinal organoids at 36 hours after OC43 virus inoculation. Epithelial membrane of organoids was stained with EpCAM (yellow). Scale bar, 50  $\mu\text{m}$ .

(J) QRT-PCR quantification of viral RNA level ( $n = 2$ ) and confocal imaging of viral replicating dsRNA (red) in THP-1 macrophages infected with OC43 virus at 36 hours post-inoculation. THP1-derived macrophages were labeled by CFSE (green). Scale bar, 50  $\mu\text{m}$ .

(K) QRT-PCR quantification of antiviral ISGs expression in organoids and inflammatory-associated genes expression in THP-1 macrophages upon OC43 infection ( $n = 2-3$ ).

(L) Quantification of IL-1 $\beta$  gene expression in MavgOs at 36 hours after OC43 infections compared to uninfected MavgOs ( $n = 4$ ).

(M) ELISA quantification of IL-6, IL-8 and TNF- $\alpha$  that secreted into supernatant of uninfected and OC43 infected MavgOs ( $n = 4$ ).

(N) Confocal imaging of OC43 virus infection in MavgOs integrated iPSCs-derived macrophages. Scale bar, 50  $\mu\text{m}$ .

(O) Quantification of IL-1 $\beta$  production in uninfected and OC43 infected MavgOs integrated iPSCs-derived macrophages ( $n = 4$ ).

(P) Confocal imaging of OC43 virus infection in MavgOs integrated PBMC-derived macrophages. Scale bar, 50  $\mu\text{m}$ .

(Q) Quantification of IL-1 $\beta$  production in uninfected and OC43 infected MavgOs integrated PBMC-derived macrophages ( $n = 4$ ).

Data were presented as means of biological replicates  $\pm$  SEM. Statistical analysis was performed using the two-tailed Mann–Whitney test. \* $p < 0.05$ .

## Supplementary Figure 3

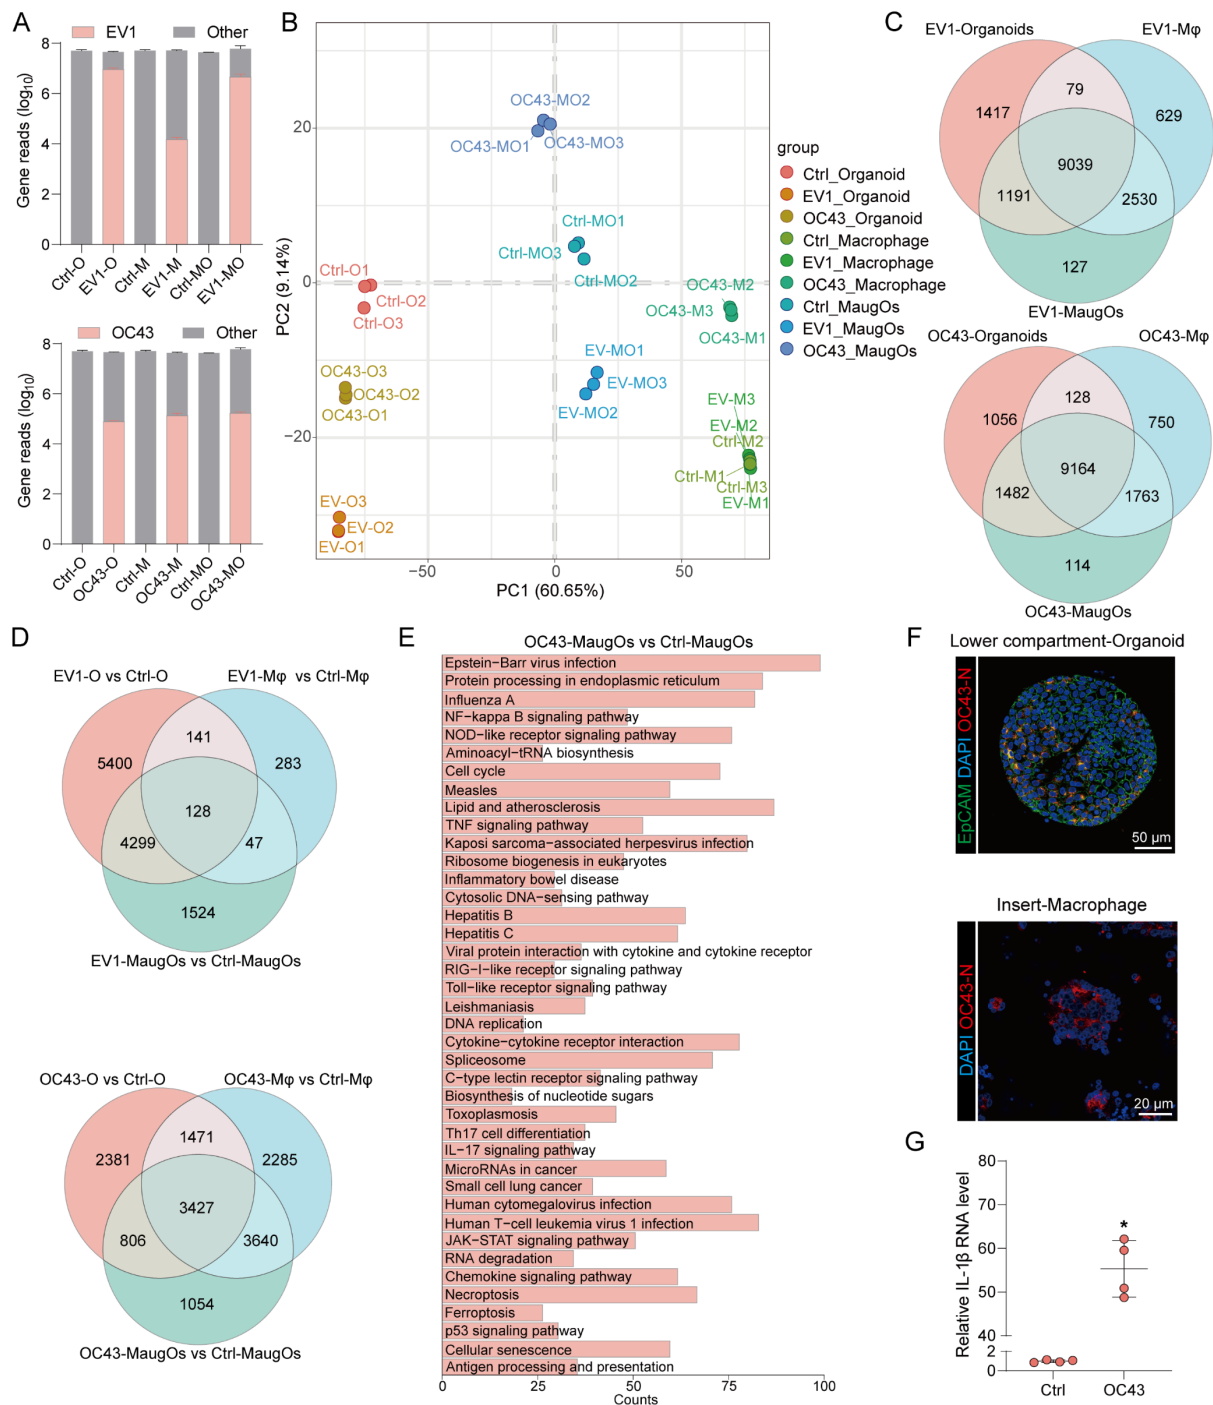

**Supplementary Figure 3. Coronavirus OC43 infection in MaugOs triggers both antiviral and inflammatory responses**

(A) The reads of mapped OC43 or EV1 viral transcripts in organoids, THP-1 macrophages and MaugOs integrated THP-1 macrophages (n = 3).

(B) Principal component analysis of infected and uninfected organoids, THP-1 macrophages and MaugOs integrated THP-1 macrophages (n=3).

(C) Venn diagram of overlapped differentially expressed genes in macrophages (Mφ), intestinal organoids and MaugOs upon EV1 or OC43 infection at 36 hour post-inoculation.

(D) Venn diagram of overlapped differentially expressed genes among EV1- or OC43-infected macrophages (M $\phi$ ), intestinal organoids and MaugOs compared to uninfected sample at 36 hour post-inoculation (n=3).

(E) Top 40 significantly regulated KEGG pathways in OC43-infected MaugOs compared to MaugOs without OC43 infection (n = 3).

(F) Confocal imaging of OC43-N protein (red) in organoids at the lower compartment and macrophages at the upper compartment, with the epithelial membrane of organoids stained with EpCAM (green). Scale bar, 50  $\mu$ m and 20  $\mu$ m.

(G) QRT-PCR quantification of IL-1 $\beta$  gene expression in apical THP-1 macrophages (n = 4).

Data were presented as means of biological replicates  $\pm$  SEM. Statistical analysis was performed using the two-tailed Mann–Whitney test. \*p < 0.05.

## Supplementary Figure 4

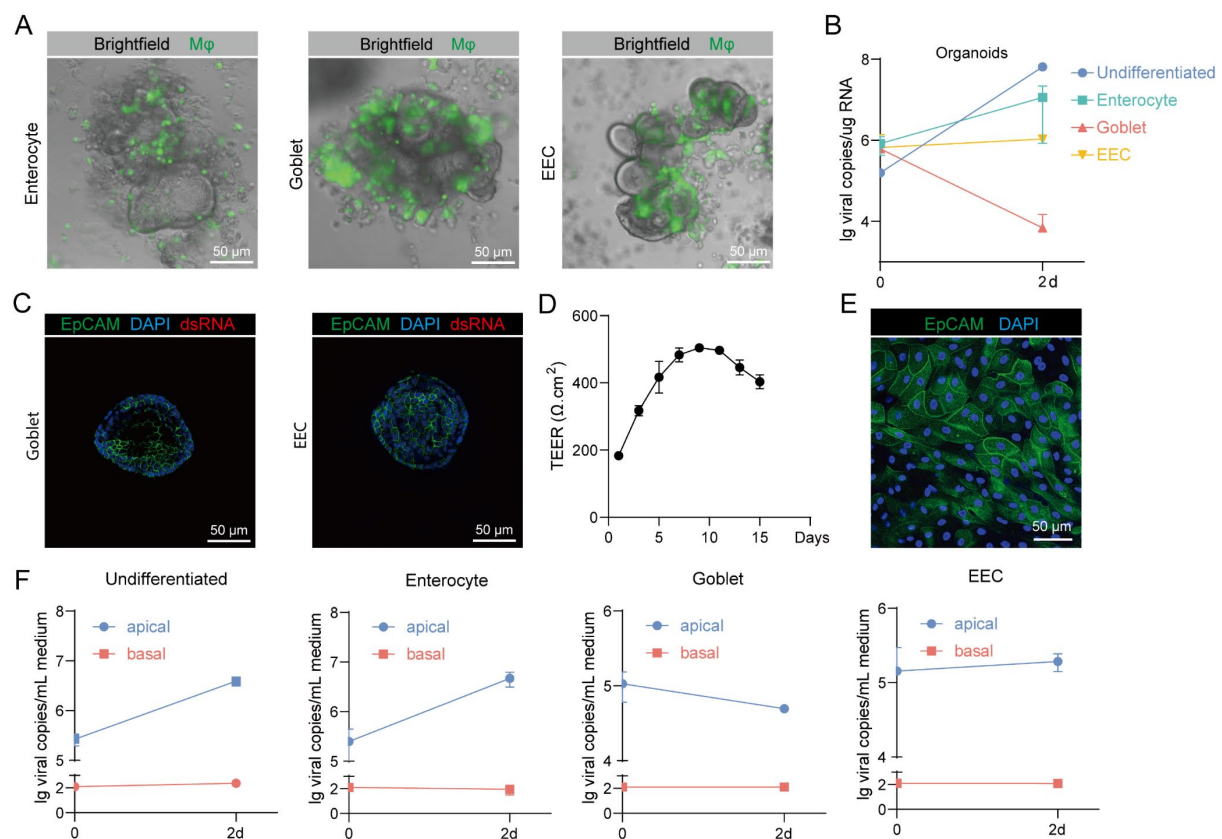

## Supplementary Figure 4. Establishment of MaugOs using differentiated intestinal organoids.

(A) Morphology of MaugOs integrated with enterocytes-, goblet cells- and enteroendocrine cells - differentiated organoids. THP-1 -derived macrophages were stained by CFSE (green). Scale bar, 50 μm.

(B) Quantification of OC43 viral RNA level in undifferentiated and differentiated organoids at 48 hours post infection (n = 3).

(C) Confocal imaging of viral replicating dsRNA in goblet cell-differentiated organoids and enteroendocrine cells (EEC)-differentiated organoids at 48 hours post infection (dsRNA fluorescence signal was not detected). Scale bar, 50 μm.

(D) TEER values of the monolayer in the trans-well membrane test at 1, 3, 5, 7, 9, 11, 13, and 15 days after seeding the cells.

(E) Confocal imaging of trans-well monolayer showing the epithelial membrane of organoid cells stained with EpCAM (green). Scale bar, 50 μm.

(F) Quantification of OC43 viral RNA levels in the culture medium of apical and basolateral compartment in trans-well system at 48 hours post-infection (n = 3).

## Supplementary Figure 5

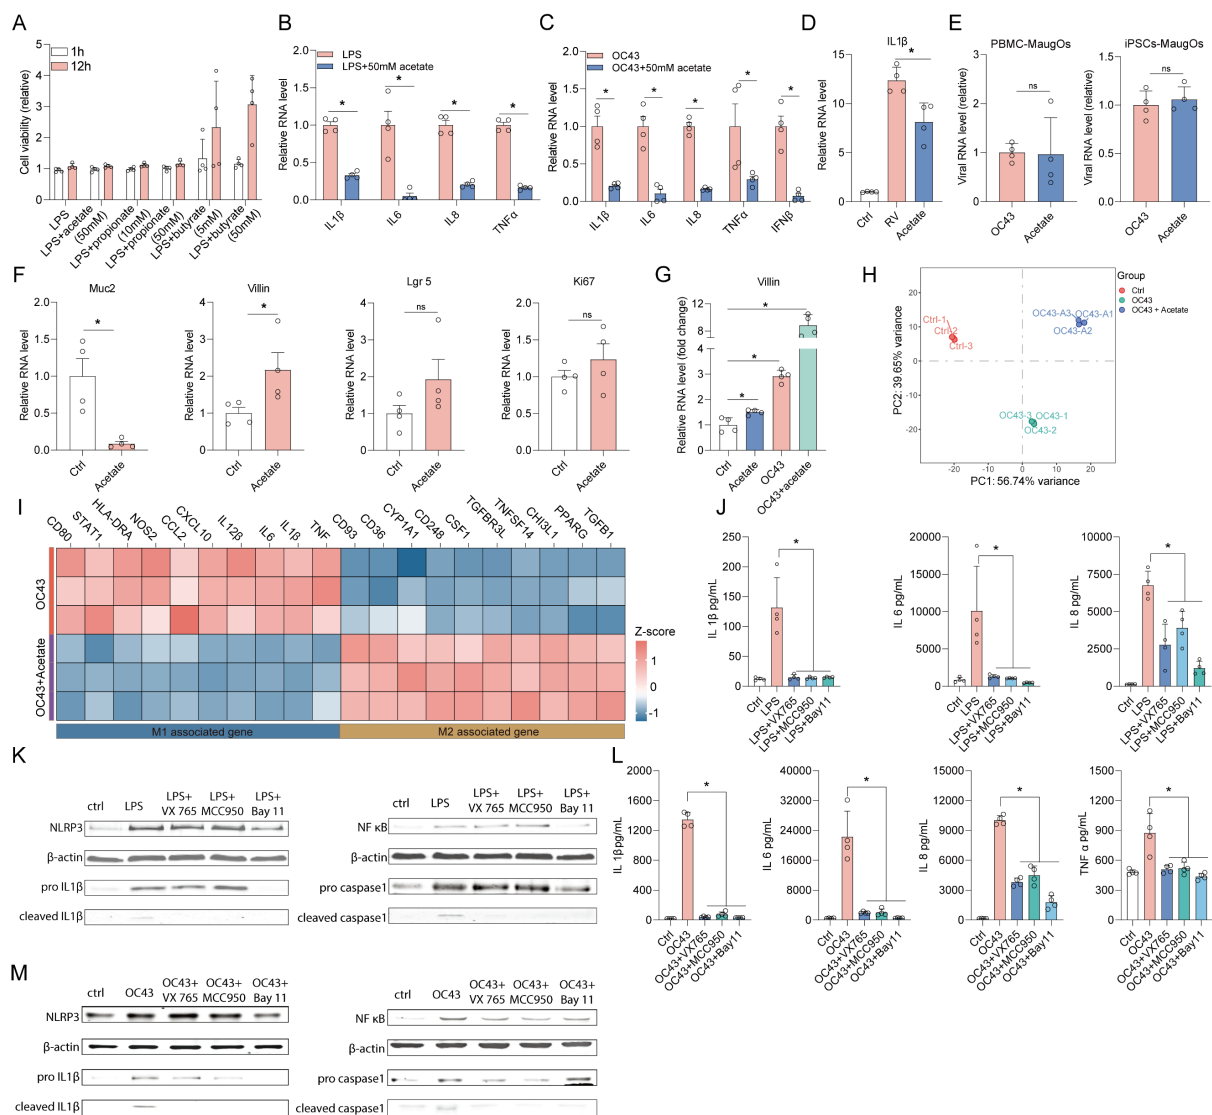

**Supplementary Figure 5. Characterizing the function of acetate on enteric infection and inflammatory response.**

(A) Cell viability of MaugOs after treatment with LPS and various SCFAs for 12 hours (n = 4).

(B) The effect of acetate on the expression of IL-1 $\beta$ , IL-6, IL-8, and TNF $\alpha$  in LPS-treated MaugOs quantified by qRT-PCR (n = 4).

(C) The effect of acetate on the expression of IL-1 $\beta$ , IL-6, IL-8, TNF $\alpha$ , and IFN $\beta$  in OC43-infected MaugOs quantified by qRT-PCR (n = 4).

(D) The effect of acetate on the expression of IL-1 $\beta$  in rotavirus-infected MaugOs quantified by qRT-PCR (n = 4).

(E) Quantification of viral RNA level in OC43-infected MaugOs integrated PBMC- or iPSCs derived macrophages with or without 50mM acetate treatment for 36 hours (n = 4).

(F) The effect of acetate on the expression of Villin, Muc2, Lgr5, and Ki67 in organoids quantified by qRT-PCR (n = 4).

(G) Quantification of IL-1 $\beta$  gene expression in MaugOs integrated THP-1 derived macrophages. MaugOs were triggered by OC43 infection with or without 50mM acetate treatment for 36 hours (n = 4).

- (H) PCA of different MavgOs groups with three replicates per group (control: uninfected MavgOs; OC43: OC43 infected MavgOs; OC43+Acetate: 50 mM acetate treatment in OC43-infected MavgOs).
- (I) Profiling the influence of acetate on representative gene markers expression of M1- and M2-phenotype macrophage. OC43: OC43 virus infected-MavgOs; Acetate: OC43 virus infected-MavgOs with 50 mM acetate treatment for 36 hours (n = 3).
- (J) Quantification of the IL-1 $\beta$  protein production in the supernatant of MavgOs integrated THP-1 derived macrophages. MavgOs were triggered by LPS with or without treatment of VX765, MCC950 and BAY 11 for 36 hours (n = 4).
- (K) The inhibitory effect of VX765, MCC950 and BAY 11 treatment on the protein level of NF- $\kappa$ B and NLRP3 signaling cascade in LPS treated MavgOs at 36 hours determined by western blotting. NF- $\kappa$ B, NLRP3, pro IL-1 $\beta$  and pro caspase 1 were detected from cell lysates; Cleaved caspase-1 and cleaved IL-1 $\beta$  were detected from culture supernatant.
- (L) Quantification of the IL-1 $\beta$  protein production in the supernatant of MavgOs integrated THP-1 derived macrophages. MavgOs were triggered by OC43 infection with or without treatment of VX765, MCC950 and BAY 11 for 36 hours (n=4).
- (M) The inhibitory effect of VX765, MCC950 and BAY 11 treatment on the protein level of NF- $\kappa$ B and NLRP3 signaling cascade in OC43-infected MavgOs at 36 hours. NF- $\kappa$ B, NLRP3, pro IL-1 $\beta$  and pro caspase 1 were detected from cell lysates; Cleaved caspase-1 and cleaved IL-1 $\beta$  were detected from culture supernatant.
- Data were presented as means of biological replicates  $\pm$  SEM. Statistical analysis was performed using the two-tailed Mann–Whitney test. \*p < 0.05.



Supplementary Figure 6

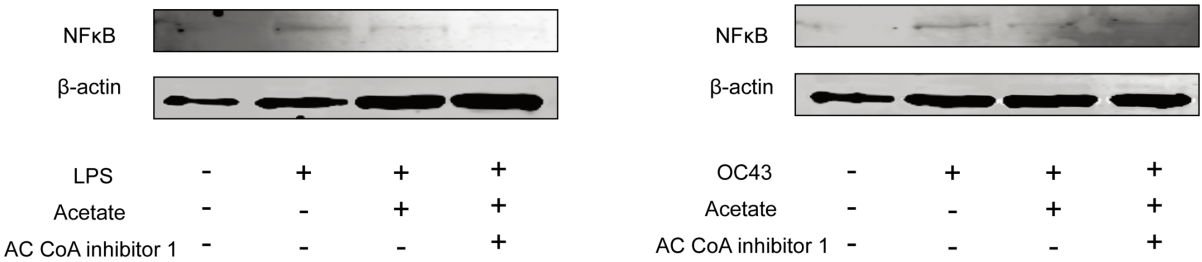

**Supplementary Figure 6. Dissecting the mechanism-of-action of the anti-inflammatory effect of acetate.**

The effect of AC-CoA inhibitor 1 on the protein level of NF-κB signaling pathway in LPS-treated or OC43-infected MaugOs at 36 hours determined by western blotting.

## Supplementary Figure 7

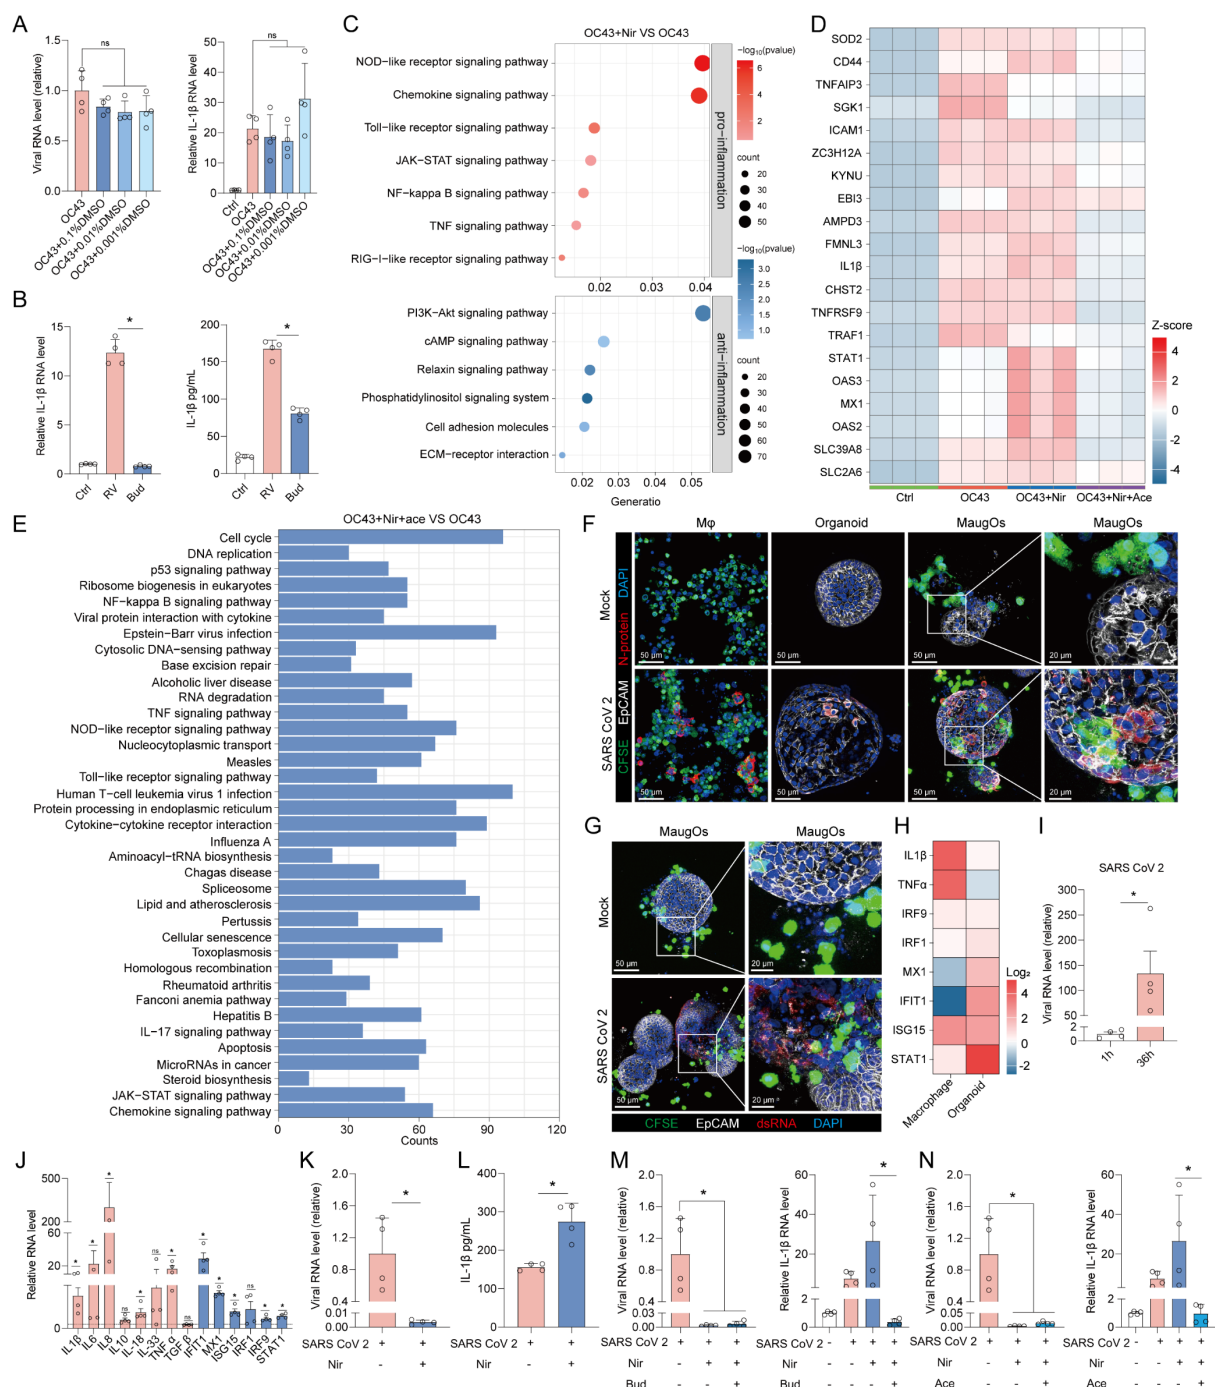

## Supplementary Figure 7. Devising combination treatment against enteric viral infections in MaugOs.

(A) Quantification of OC43 viral RNA and IL-1 $\beta$  gene expression in OC43 infected MaugOs after treatment with varying concentrations of DMSO for 36 hours ( $n = 4$ ).

(B) Quantification of IL-1 $\beta$  gene expression and protein production in rotavirus-infected MaugOs after budesonide treatment for 36 hours ( $n = 4$ ).

(C) Significantly regulated pathways by KEGG analysis at 36 hours in OC43 infected MaugOs with 1  $\mu$ M nirmatrelvir treatment ( $p < 0.05$ ), compared with the non-treatment group. Red: upregulated; blue: downregulated ( $n = 3$ ).

(D) Top 20 significantly regulated genes upon OC43 infection in MaugOs ( $n = 3$ ).

(E) Top 40 significantly regulated KEGG pathways in OC43-infected MavgOs compared to MavgOs without OC43 infection (n = 3).

(F) Immunofluorescence staining of SARS-CoV-2 N-protein (red) in THP-1 macrophages, organoids, and MavgOs at 36 hours post virus inoculation. Macrophages were marked by CFSE (green); Organoid cell membrane was stained by EpCAM (white); Cell nucleus (DAPI, blue). Scale bar, 50  $\mu$ m.

(G) Immunofluorescence staining of SARS-CoV-2 dsRNA (red) in MavgOs at 36 hours post virus inoculation. Macrophages were marked by CFSE (green); Organoid cell membrane was stained by EpCAM (white); Cell nucleus (DAPI, blue). Scale bar, 50  $\mu$ m.

(H) The expression of inflammatory and interferon associated genes triggered by SARS-CoV-2 infection in macrophage and organoids at 36 hours quantified by qRT-PCR (n = 2).

(I) QRT-PCR quantification of viral RNA level in SARS-CoV-2 infected MavgOs at 1 hour and 36 hour post-inoculation (n = 4).

(J) The expression of inflammatory and interferon associated genes triggered by SARS-CoV-2 infection in MavgOs at 36 hours quantified by qRT-PCR (n = 4).

(K) The effect of 1 $\mu$ M nirmatrelvir treatment on SARS-CoV-2 viral RNA level in MavgOs at 36 hours post-treatment (n = 4).

(L) The production of IL-1 $\beta$  in the supernatant of SARS-CoV-2 infected MavgOs after treatment of 1  $\mu$ M nirmatrelvir for 36 hours (n = 4).

(M) Quantification of SARS-CoV2 viral RNA and IL-1 $\beta$  gene expression in MavgOs after combination treatment of 1  $\mu$ M nirmatrelvir and 1  $\mu$ M budesonide for 36 hours (n = 4).

(N) Quantification of SARS-CoV2 viral RNA and IL-1 $\beta$  gene expression in MavgOs after combination treatment of 1  $\mu$ M nirmatrelvir and 50 mM acetate for 36 hours (n = 4).

Data were presented as means of biological replicates  $\pm$  SEM. Statistical analysis was performed using the two-tailed Mann–Whitney test. \*p < 0.05.

**Supplementary Table 1. Detailed information of genes expressed exclusively in MavgOs, related to Fig. 1E.**

| Gene name  | Gene biotype           |
|------------|------------------------|
| CENPS      | protein_coding         |
| RF00019    | misc_RNA               |
| MIR6730    | miRNA                  |
| AL033527.3 | antisense              |
| AC093423.2 | sense_intronic         |
| MFSD14A    | protein_coding         |
| AL451085.2 | antisense              |
| SNRPGP10   | processed_pseudogene   |
| AC138393.3 | lincRNA                |
| AL512343.2 | antisense              |
| RNU4-21P   | snRNA                  |
| AL355472.1 | antisense              |
| SOS1-IT1   | sense_intronic         |
| AC062037.2 | antisense              |
| FAHD2B     | protein_coding         |
| RF00019    | misc_RNA               |
| RF02271    | misc_RNA               |
| MIR6512    | miRNA                  |
| SNORA75    | snoRNA                 |
| LINC02585  | antisense              |
| AC137630.3 | antisense              |
| AC112484.4 | TEC                    |
| RNU6-720P  | snRNA                  |
| AC104411.1 | antisense              |
| RNU7-82P   | snRNA                  |
| RNU6-315P  | snRNA                  |
| RF00019    | misc_RNA               |
| RF00554    | snoRNA                 |
| AC079921.2 | lincRNA                |
| AC093827.4 | antisense              |
| SHLD3      | protein_coding         |
| AC010359.1 | lincRNA                |
| GUSBP9     | unprocessed_pseudogene |
| AC116347.1 | processed_pseudogene   |
| RNU6-444P  | snRNA                  |
| AL023693.1 | antisense              |
| SNORA15B-1 | snoRNA                 |
| MIR5692C2  | miRNA                  |
| AC018638.3 | processed_pseudogene   |
| RNA5SP243  | rRNA_pseudogene        |
| MIR503     | miRNA                  |
| IKBKGP1    | unprocessed_pseudogene |
| F8A2       | protein_coding         |
| AC067838.1 | lincRNA                |
| RNU6-323P  | snRNA                  |
| RF00019    | misc_RNA               |
| RF00019    | misc_RNA               |
| MIR181B2   | miRNA                  |

|            |                        |
|------------|------------------------|
| RNU4-39P   | snRNA                  |
| DEFB131B   | protein_coding         |
| RF00409    | snoRNA                 |
| RF00019    | misc_RNA               |
| RPL11P3    | processed_pseudogene   |
| MIR4685    | miRNA                  |
| MIR4295    | miRNA                  |
| AC005342.2 | antisense              |
| AC048341.2 | lincRNA                |
| AC084032.1 | lincRNA                |
| RF00019    | misc_RNA               |
| RNU2-7P    | snRNA                  |
| RN7SL49P   | misc_RNA               |
| SNORA79B   | snoRNA                 |
| RNU6-341P  | snRNA                  |
| RNU6-689P  | snRNA                  |
| AC135983.5 | processed_pseudogene   |
| ZNF444P1   | processed_pseudogene   |
| RF00093    | snoRNA                 |
| AC009065.4 | lincRNA                |
| AC108134.4 | sense_overlapping      |
| NPIPA7     | protein_coding         |
| MIR3181    | miRNA                  |
| GPS2       | protein_coding         |
| MIR1180    | miRNA                  |
| MIR6779    | miRNA                  |
| RF00019    | misc_RNA               |
| SNORD1B    | snoRNA                 |
| AC087222.1 | lincRNA                |
| SNRPGP2    | processed_pseudogene   |
| AL031665.2 | antisense              |
| AL390198.2 | unprocessed_pseudogene |
| MIR4755    | miRNA                  |
| SNORA60    | snoRNA                 |
| AL121845.4 | antisense              |
| IZUMO4     | protein_coding         |
| AC011447.4 | unprocessed_pseudogene |
| AD001527.1 | antisense              |
| RF00019    | misc_RNA               |
| MIR6796    | miRNA                  |
| ZNF836     | protein_coding         |
| PSMA6P1    | processed_pseudogene   |
| AC245060.2 | lincRNA                |
| AL021878.2 | sense_intronic         |

**Supplementary Table 2. Detailed information of genes expressed exclusively in EV1 infected MaugOs, related to Supplementary Fig. 3C.**

| Gene name  | Gene biotype                       |
|------------|------------------------------------|
| RPL23AP24  | processed_pseudogene               |
| MMP23A     | unprocessed_pseudogene             |
| ZBTB40-IT1 | sense_intronic                     |
| AL033527.2 | antisense                          |
| RNU5F-1    | snRNA                              |
| AL356968.2 | processed_pseudogene               |
| MIR6500    | miRNA                              |
| RNU6-877P  | snRNA                              |
| DLSTP1     | processed_pseudogene               |
| AL139421.1 | processed_pseudogene               |
| RNU6-817P  | snRNA                              |
| AC245100.5 | processed_pseudogene               |
| MIR4258    | miRNA                              |
| AL355472.1 | antisense                          |
| CHAC2      | protein_coding                     |
| MIR5192    | miRNA                              |
| MIR5696    | miRNA                              |
| AC108463.1 | processed_pseudogene               |
| AC104653.2 | lincRNA                            |
| RNU6-377P  | snRNA                              |
| RF00019    | misc_RNA                           |
| RNU4-78P   | snRNA                              |
| C3orf18    | protein_coding                     |
| AC026877.1 | processed_pseudogene               |
| LINC02035  | lincRNA                            |
| RF00019    | misc_RNA                           |
| RF01210    | snoRNA                             |
| RF01241    | snoRNA                             |
| HTRA3      | protein_coding                     |
| RF00026    | snRNA                              |
| SNORA26    | snoRNA                             |
| AC018797.2 | antisense                          |
| RNU6-540P  | snRNA                              |
| AC139495.1 | transcribed_unprocessed_pseudogene |
| AC139272.1 | unprocessed_pseudogene             |
| AC008438.1 | antisense                          |
| SNORA38    | snoRNA                             |
| ABHD16A    | protein_coding                     |
| RF00019    | misc_RNA                           |
| RNU6-444P  | snRNA                              |
| MIR1273C   | miRNA                              |
| MIR3146    | miRNA                              |
| AC005154.1 | processed_pseudogene               |
| SNORA5A    | snoRNA                             |
| VN1R42P    | processed_pseudogene               |
| MIR4284    | miRNA                              |
| SDHAF3     | protein_coding                     |
| AC004975.1 | processed_pseudogene               |



|            |                                    |
|------------|------------------------------------|
| GK-AS1     | antisense                          |
| SNORA11    | snoRNA                             |
| ETDC       | protein_coding                     |
| MIR3149    | miRNA                              |
| FAM92A     | protein_coding                     |
| RNU6-875P  | snRNA                              |
| MIR7848    | miRNA                              |
| RNA5SP530  | rRNA                               |
| RF00019    | misc_RNA                           |
| RNU6-1160P | snRNA                              |
| RF00019    | misc_RNA                           |
| RNU6-878P  | snRNA                              |
| AP006296.1 | processed_pseudogene               |
| IMMP1L     | protein_coding                     |
| RNU6-45P   | snRNA                              |
| MIR6750    | miRNA                              |
| AP001893.1 | antisense                          |
| AC022400.1 | antisense                          |
| RNU6-780P  | snRNA                              |
| RNU6-422P  | snRNA                              |
| AL451069.1 | lincRNA                            |
| RF00019    | misc_RNA                           |
| FAM86FP    | transcribed_unprocessed_pseudogene |
| AC009318.2 | antisense                          |
| GPD1       | protein_coding                     |
| RNU7-4P    | snRNA                              |
| THAP2      | protein_coding                     |
| AL157932.1 | antisense                          |
| AL157813.1 | sense_intronic                     |
| BIVM       | protein_coding                     |
| AL132800.1 | antisense                          |
| SNORD127   | snoRNA                             |
| MIR4505    | miRNA                              |
| RAP1AP     | processed_pseudogene               |
| LINC02328  | lincRNA                            |
| RF00019    | misc_RNA                           |
| AL138976.2 | antisense                          |
| AC060814.1 | processed_pseudogene               |
| EIF3J-DT   | lincRNA                            |
| RF00019    | misc_RNA                           |
| AC100830.2 | antisense                          |
| AC064799.1 | processed_pseudogene               |
| RPS17      | protein_coding                     |
| RNU6-1111P | snRNA                              |
| AC027020.2 | lincRNA                            |
| AL031716.1 | antisense                          |
| GLIS2-AS1  | lincRNA                            |
| AC126755.2 | protein_coding                     |
| SNORA46    | snoRNA                             |
| MIR1972-2  | miRNA                              |
| SNORD71    | snoRNA                             |
| RF00019    | misc_RNA                           |

|            |                        |
|------------|------------------------|
| RF00598    | snoRNA                 |
| MIR6774    | miRNA                  |
| AC015922.1 | unprocessed_pseudogene |
| AC090615.1 | unprocessed_pseudogene |
| AC104564.3 | sense_intronic         |
| AC138207.3 | processed_pseudogene   |
| TBC1D3G    | protein_coding         |
| MIR4734    | miRNA                  |
| RF00422    | scaRNA                 |
| AC111186.1 | processed_pseudogene   |
| AC087222.1 | lincRNA                |
| AC090772.4 | TEC                    |
| RF00275    | snoRNA                 |
| RPL37AP1   | processed_pseudogene   |
| MIR6812    | miRNA                  |
| AC008752.3 | unprocessed_pseudogene |
| AC005546.1 | lincRNA                |
| MIR3188    | miRNA                  |
| RF00611    | snoRNA                 |
| AC002398.1 | antisense              |
| AC006213.5 | sense_intronic         |
| MIR4324    | miRNA                  |
| AP000526.1 | sense_intronic         |
| RNA5SP494  | rRNA_pseudogene        |
| AL031186.1 | antisense              |
| AL031593.1 | lincRNA                |
| AC007325.4 | protein_coding         |

**Supplementary Table 3. Detailed information of genes expressed exclusively in OC43 infected MaugOs, related to Fig. 3C.**

| Gene name  | Gene biotype         |
|------------|----------------------|
| RF00019    | misc_RNA             |
| UQCRHL     | protein_coding       |
| OSCP1      | protein_coding       |
| CYP4X1     | protein_coding       |
| RAB3B      | protein_coding       |
| AL049597.2 | antisense            |
| OVGP1      | protein_coding       |
| RNY1P13    | misc_RNA             |
| HMGCS2     | protein_coding       |
| RF00015    | snRNA                |
| S100A2     | protein_coding       |
| AL353807.4 | processed_pseudogene |
| MFSD4A     | protein_coding       |
| CAPN9      | protein_coding       |
| RPL35P1    | processed_pseudogene |
| RNU6-137P  | snRNA                |
| AC016735.1 | lincRNA              |
| AC007283.2 | processed_pseudogene |
| ALPP       | protein_coding       |
| RF00019    | misc_RNA             |
| MIR191     | miRNA                |
| CHCHD6     | protein_coding       |
| AC084036.1 | antisense            |
| AC080013.6 | lincRNA              |
| UBE2V1P2   | processed_pseudogene |
| RN7SL738P  | misc_RNA             |
| AC144530.1 | processed_pseudogene |
| RNA5SP155  | rRNA_pseudogene      |
| RPS29P11   | processed_pseudogene |
| SNORA26    | snoRNA               |
| RF00019    | misc_RNA             |
| SEMA5A     | protein_coding       |
| AC006077.2 | TEC                  |
| AL139095.2 | processed_pseudogene |
| AL031775.1 | antisense            |
| MUCL3      | protein_coding       |
| AL603910.1 | antisense            |
| MIR3662    | miRNA                |
| SLC22A3    | protein_coding       |
| MIR339     | miRNA                |
| IGFBP1     | protein_coding       |
| RNU6-1091P | snRNA                |
| PEG10      | protein_coding       |
| MIR93      | miRNA                |
| RNA5SP243  | rRNA_pseudogene      |
| FAM131B    | protein_coding       |
| AC005586.1 | antisense            |
| MIR6089    | miRNA                |

|            |                      |
|------------|----------------------|
| REPS2      | protein_coding       |
| NHS        | protein_coding       |
| SLC9A7     | protein_coding       |
| AL139396.1 | processed_pseudogene |
| RPS23P8    | processed_pseudogene |
| ZNF185     | protein_coding       |
| AC144568.1 | processed_pseudogene |
| AC016065.1 | antisense            |
| RNU6-892P  | snRNA                |
| RNU7-181P  | snRNA                |
| RN7SL5P    | misc_RNA             |
| SLC4A1APP1 | processed_pseudogene |
| GNA14      | protein_coding       |
| RF00019    | misc_RNA             |
| STXBP1     | protein_coding       |
| RNU7-171P  | snRNA                |
| AL391056.1 | lincRNA              |
| PRRT1B     | protein_coding       |
| MUC5AC     | protein_coding       |
| AC104563.1 | processed_pseudogene |
| AP003555.3 | lincRNA              |
| PLEKHB1    | protein_coding       |
| LIPT2      | protein_coding       |
| AP002360.1 | lincRNA              |
| RF00019    | misc_RNA             |
| KAT6B      | protein_coding       |
| EIF5AL1    | protein_coding       |
| HABP2      | protein_coding       |
| PTMAP4     | processed_pseudogene |
| EIF2S3B    | protein_coding       |
| SNORA2A    | snoRNA               |
| KRT6B      | protein_coding       |
| AC073896.3 | antisense            |
| MIRLET7I   | miRNA                |
| AC069234.5 | lincRNA              |
| AL161719.1 | lincRNA              |
| MYO16-AS1  | antisense            |
| RN7SL3     | misc_RNA             |
| RHOV       | protein_coding       |
| AC044787.1 | processed_pseudogene |
| RNU6-807P  | snRNA                |
| NPW        | protein_coding       |
| CLUAP1     | protein_coding       |
| MIR6769A   | miRNA                |
| UBE2MP1    | processed_pseudogene |
| CCDC102A   | protein_coding       |
| TPPP3      | protein_coding       |
| RF00019    | misc_RNA             |
| IL17C      | protein_coding       |
| AC138207.3 | processed_pseudogene |
| TBC1D3G    | protein_coding       |
| ANKFN1     | protein_coding       |

|            |                                    |
|------------|------------------------------------|
| SNORD1B    | snoRNA                             |
| AL035071.1 | lincRNA                            |
| RPL37AP1   | processed_pseudogene               |
| SNORD12C   | snoRNA                             |
| EEF1A2     | protein_coding                     |
| AC005256.1 | lincRNA                            |
| ZNF561-AS1 | processed_transcript               |
| RF00285    | snoRNA                             |
| APOC1P1    | transcribed_unprocessed_pseudogene |
| IGFL1      | protein_coding                     |
| AC010332.1 | unprocessed_pseudogene             |
| NDUFV2P1   | processed_pseudogene               |
| RPL5P34    | processed_pseudogene               |
| MT-TQ      | Mt_tRNA                            |

**Supplementary Table 4. Detailed information of the compounds, antibodies, viruses, and software used in this study.**

| REAGENT<br>RESOURCE                                  | or | SOURCE                     | IDENTIFIER  |
|------------------------------------------------------|----|----------------------------|-------------|
| <b>Antibodies against</b>                            |    |                            |             |
| IL-1 $\beta$ (D3U3E), rabbit                         |    | Cell Signaling Technology  | 12703       |
| Cleaved IL-1 $\beta$ , rabbit                        |    | Cell Signaling Technology  | 83186S      |
| NLRP3, rabbit                                        |    | ThermoFisher Scientific    | PA5-20838   |
| OC43-N, mouse                                        |    | Sigma-Aldrich              | MAB9012     |
| SRAS CoV 2-N, mouse                                  |    | Thermo Fisher Scientific   | MA5-29981   |
| dsRNA, mouse                                         |    | SCICON                     | 10010200    |
| $\beta$ -actin, mouse                                |    | Santa Cruz Biotechnology   | sc-47778    |
| Caspase 1, rabbit                                    |    | Cell Signaling Technology  | 24232       |
| Cleaved caspase 1, rabbit                            |    | Cell Signaling Technology  | 4199        |
| NF $\kappa$ B, rabbit                                |    | Cell Signaling Technology  | 8242        |
| Villin, mouse                                        |    | Santa Cruz Biotechnology   | sc-66022    |
| Muc 2, mouse                                         |    | Santa Cruz Biotechnology   | sc-59859    |
| CHGA, mouse                                          |    | Santa Cruz Biotechnology   | sc-393941   |
| Epcam, rabbit                                        |    | Abcam                      | ab71916     |
| CD14-eFluor450                                       |    | Thermo Fisher Scientific   | 11-0149-41  |
| CD32-PE                                              |    | Thermo Fisher Scientific   | 12-0329-42  |
| CD68 Monoclonal Antibody (KP1)                       |    | Thermo Fisher Scientific   | 14-0688-82  |
| HRP Horse Anti-Mouse IgG Detection Kit,              |    | VectorLabs                 | MP-7402     |
| CD16-FITC                                            |    | Nuclilab                   | 1F-399-T100 |
| CD68-BV785                                           |    | Biolegend                  | 333826      |
| CD80-PECy7                                           |    | Biolegend                  | 305218      |
| HLA DR-BV605                                         |    | Biolegend                  | 307640      |
| CD14-BV711                                           |    | Biolegend                  | 301838      |
| CD45-APC-Fire750                                     |    | Biolegend                  | 304062      |
| IgG1-FITC                                            |    | BD Pharmingen              | 556026      |
| IgG2b-BV785                                          |    | Biolegend                  | 402219      |
| IgG1-PECy7                                           |    | Biolegend                  | 400126      |
| IgG2a-BV605                                          |    | Biolegend                  | 400270      |
| Phospho-STAT1 (Tyr701)                               |    | Cell Signalling Technology | 7649        |
| IRF-9 (D2T8M)                                        |    | Cell Signalling Technology | 76684       |
| PKR (D7F7)                                           |    | Cell Signalling Technology | 12297       |
| Phospho-eIF2 $\alpha$ (Ser51)                        |    | Cell Signalling Technology | 3398        |
| IRDye <sup>®</sup> 680RD Goat anti-Mouse IgG (H + L) |    | Westburg BV                | 926-68070   |



|                                                |                               |                   |
|------------------------------------------------|-------------------------------|-------------------|
| IRDye® 800CW Goat anti-Rabbit IgG (H + L)      | Westburg BV                   | 926-32211         |
| Alexa Fluor 488 Goat – anti-rabbit             | Thermo Fisher Scientific      | A32731            |
| Alexa Fluor 555 Goat anti-Rabbit               | ThermoFisher Scientific       | A-21428           |
| Alexa Fluor 594 Goat anti-Mouse                | ThermoFisher Scientific       | A32742            |
| Alexa Fluor 647 Goat anti-Rabbit               | Thermo Fisher Scientific      | A-21245           |
| <b>Virus strains</b>                           |                               |                   |
| SARS-CoV-2 Omicron                             | Erasmus Medical Center        | GenBank: MT270101 |
| OC43                                           | Erasmus Medical Center        | GenBank: AY585228 |
| Echovirus 1                                    | Erasmus Medical Center        | GenBank: AF029859 |
| Echovirus 6                                    | Erasmus Medical Center        | GenBank: JQ929657 |
| Rotavirus SA11                                 | Erasmus Medical Center        | GenBank: X16830   |
| <b>Chemicals</b>                               |                               |                   |
| Matrigel                                       | Corning                       | 356231            |
| Immobilon® Block - FL (Fluorescent Blocker)    | Merck Chemicals BV            | WBAVDL01          |
| Intercept® (PBS) Blocking Buffer               | LI-COR                        | 927-70010         |
| Immobilon-FL PVDF, 0.45 µm, 8.5 cm x 10 m roll | Merck Chemicals BV            | IPFL85R           |
| PrimeScript™ RT Master Mix (Perfect Real Time) | Takara Bio Europe S.A.S.      | RR036A            |
| Methanol                                       | Boom                          | 72,032,213.2500   |
| TrypLE                                         | ThermoFisher Scientific       | 12,604,013        |
| HEPES                                          | Lonza/Fisher Scientific       | BE17-737E         |
| N-2 supplement (50x)                           | Gibco/ThermoFisher Scientific | 15,410,294        |
| B27 supplement 50x without vitamin A           | Gibco/ThermoFisher Scientific | 12,587,001        |
| Gastrin I                                      | Sigma-Aldrich                 | G9145             |
| n-Acetyl Cysteine                              | Sigma-Aldrich                 | A7250-5G          |
| EGF                                            | Peptrotech                    | AF-100-15         |
| A83-01                                         | Cayman Chemical/Sanbio        | 9,001,799–25      |
| Nicotinamide                                   | Sigma-Aldrich                 | N0636-100G        |
| SB 202190                                      | Sigma-Aldrich                 | S7067-5MG         |
| SB431542                                       | Sigma-Aldrich                 | 616464-5MG        |
| Y-27632                                        | MedChem Express/Bioconnect    | HY-10583_10mg     |
| DAPT Selleck                                   | Chemicals/Bioconnect          | S2215_10mg        |
| Dexamethasone (Dex)                            | Sigma-Aldrich                 | D4902-100MG       |
| 6-mercaptopurine (6-MP)                        | MedChem Express               | HY-13677          |
| Methotrexate (MTX)                             | MedChem Express               | HY-14519          |
| Tofacitinib (Tof)                              | MedChem Express               | HY-40354          |

|                                                    |                                    |                                                                                                                   |
|----------------------------------------------------|------------------------------------|-------------------------------------------------------------------------------------------------------------------|
| Budesonide (Bud)                                   | MedChem Express                    | HY-13580                                                                                                          |
| 5-aminosalicylic acid (5-ASA)                      | MedChem Express                    | HY-15027                                                                                                          |
| Azathioprine (AZA)                                 | MedChem Express                    | HY-B0256                                                                                                          |
| Cyclosporin A (CSA)                                | Abcam                              | ab120114                                                                                                          |
| Prednisolone (Pred)                                | Sigma-Aldrich                      | 50-24-8                                                                                                           |
| 6-Thioguanine (6-TG)                               | Sigma-Aldrich                      | A4882-100MG                                                                                                       |
| Sodium Acetate                                     | Sigma-Aldrich                      | 127-09-3                                                                                                          |
| Sodium propionate                                  | Sigma-Aldrich                      | 137-40-6                                                                                                          |
| Sodium butyrate                                    | Sigma-Aldrich                      | 156-54-7                                                                                                          |
| Bay 11-7082                                        | Sigma-Aldrich                      | 19542-67-7                                                                                                        |
| VX-765                                             | Sigma-Aldrich                      | 273404-37-8                                                                                                       |
| MCC950                                             | Sigma-Aldrich                      | 256373-96-3                                                                                                       |
| DMEM high glucose w/Na pyruvate w/Stable glutamine | VWR International BV               | L0193-500                                                                                                         |
| PMA(12-O-Tetradecanoylphorbol 13-acetate)          | Sigma-Aldrich Chemie BV            | P1585                                                                                                             |
| RPMI 1640 (STABLE GLUTAMINE)                       | Westburg BV                        | L0498-500                                                                                                         |
| Iscove's MDM (-phenolred)                          | Life technologies                  | 21056                                                                                                             |
| F12 Nutrient Mixture (Ham)                         | Life technologies                  | 31765                                                                                                             |
| Poly vinyl alcoho                                  | Sigma-Aldrich                      | P8136                                                                                                             |
| Chemically Defined Lipids                          | Life technologies                  | 11905031                                                                                                          |
| Insulin-Transferrin-Selenium-X                     | Life technologies                  | 51500                                                                                                             |
| Monothioglycerol                                   | Sigma-Aldrich                      | M6145-25mL                                                                                                        |
| L - Ascorbic acid 2 - phosphate                    | Sigma-Aldrich                      | A8960                                                                                                             |
| Glutamax-1 supplement                              | Life technologies                  | 35050                                                                                                             |
| MEM non-essential amino acids                      | Life technologies                  | 11140035                                                                                                          |
| Accutase - Solution                                | PromoCell                          | C - 41310                                                                                                         |
| Human M-CSF                                        | Miltenyi Biotec                    | 130-096-492                                                                                                       |
| RevitaCell Supplement                              | Life technologies                  | A26445-01                                                                                                         |
| <b>Software</b>                                    |                                    |                                                                                                                   |
| Adobe Illustrator CC                               | Adobe                              | <a href="https://www.adobe.com/products/illustrator.html">https://www.adobe.com/products/illustrator.html</a>     |
| GraphPad Prism 8.0                                 | GraphPad                           | Graphpad Software                                                                                                 |
| ImageJ                                             | NIH                                | <a href="https://ImageJ.nih.gov/ij/">https://ImageJ.nih.gov/ij/</a>                                               |
| Bedtools                                           | University of Utah                 | <a href="https://github.com/arq5x/bedtools2">https://github.com/arq5x/bedtools2</a>                               |
| Integrative Genomics Viewer                        | Broad Institute of MIT and Harvard | <a href="https://software.broadinstitute.org/software/igv/">https://software.broadinstitute.org/software/igv/</a> |

|          |                          |                                                                                                                           |
|----------|--------------------------|---------------------------------------------------------------------------------------------------------------------------|
| R        | Rstudio                  | <a href="https://www.rstudio.com/products/rstudio/download/">https://www.rstudio.com/products/rstudio/download/</a>       |
| Fastp    | OpenGene                 | <a href="https://github.com/OpenGene/fastp">https://github.com/OpenGene/fastp</a>                                         |
| Bowtie2  | Johns Hopkins University | <a href="http://bowtie-bio.sourceforge.net/bowtie2/index.shtml">http://bowtie-bio.sourceforge.net/bowtie2/index.shtml</a> |
| SAMtools | Broad Institute of MIT   | <a href="http://www.htslib.org/download/">http://www.htslib.org/download/</a>                                             |
| FlowJo   | BD                       | <a href="https://www.flowjo.com/solutions/flowjo/downloads">https://www.flowjo.com/solutions/flowjo/downloads</a>         |

**Supplementary Table 5. Primer sequences used in this study.**

| Gene            | Sequence (5'-3')         |
|-----------------|--------------------------|
| GAPDH-F         | GTCTCCTCTGACTTCAACAGCG   |
| GAPDH-R         | ACCACCCTGTTGCTGTAGCAA    |
| IL-1 $\beta$ -F | CCACAGACCTTCCAGGAGAATG   |
| IL-1 $\beta$ -R | GTGCAGTTCAGTGATCGTACAGG  |
| IL-6-F          | AGACAGCCACTCACCTCTTCAG   |
| IL-6-R          | TTCTGCCAGTGCCTCTTTGCTG   |
| IL-8-F          | GAGAGTGATTGAGAGTGGAACAC  |
| IL-8-R          | CACAACCCTCTGCACCCAGTTT   |
| IL-10-F         | TCTCCGAGATGCCTTCAGCAGA   |
| IL-10-R         | TCAGACAAGGCTTGGCAACCCA   |
| IL-12-F         | GACATTCTGCGTTCAGGTCCAG   |
| IL-12-R         | CATTTTTGCGGCAGATGACCGTG  |
| IL-18-F         | GATAGCCAGCCTAGAGGTATGG   |
| IL-18-R         | CCTTGATGTTATCAGGAGGATTCA |
| TNF $\alpha$ -F | CTCTTCTGCCTGCTGCACTTTG   |
| TNF $\alpha$ -R | ATGGGCTACAGGCTTGCTACTC   |
| GM-CSF-F        | GGAGCATGTGAATGCCATCCAG   |
| GM-CSF-R        | CTGGAGGTCAAACATTCTGAGAT  |
| CCL-2-F         | AGAATCACCAGCAGCAAGTGTC   |
| CCL-2-R         | TCCTGAACCCACTTCTGCTTGG   |
| CCL-4-F         | GCTTCCTCGCAACTTTGTGGTAG  |
| CCL-4-R         | GGTCATACACGTACTCCTGGAC   |
| CXCL-10-F       | GGTGAGAAGAGATGTCTGAATCC  |
| CXCL-10-R       | GTCCATCCTTGGAAGCACTGCA   |
| CXCL10-F        | GGTGAGAAGAGATGTCTGAATCC  |
| CXCL10-R        | GAAGCACTGCA              |
| OC43-F          | AGCAACCAGGCTGATGTCAATACC |
| OC43-R          | AGCAGACCTTCTGAGCCTTCAAT  |
| SARS-CoV-2-F    | CAATGGTTTAAACAGGCACAGG   |
| SARS-CoV-2-R    | CTCAAGTGTCTGTGGATCACG    |
| EV-F            | TCCTCCGGCCCCCTGA         |
| EV-R            | RATTGTCACCATAAGCAGCCA    |
| Rota-F          | TGGTTAAACGCAGGATCGGA     |
| Rota-R          | AACCTTTCCGCGTCTGGTAG     |
| IFN $\beta$ -F  | CTTGGATTCTACAAAGAAGCAGC  |
| IFN $\beta$ -R  | TCCTCCTTCTGGAAGTCTGCA    |
| ISG15-F         | CTCTGAGCATCCTGGTGAGGAA   |
| ISG15-R         | AAGGTCAGCCAGAACAGGTCGT   |
| MX1-F           | GGCTGTTTACCAGACTCCGACA   |
| MX1-R           | CACAAAGCCTGGCAGCTCTCTA   |
| STAT1-F         | ATGGCAGTCTGGCGGCTGAATT   |

|          |                        |
|----------|------------------------|
| STAT1-R  | CCAAACCAGGCTGGCACAATTG |
| IRF1-F   | GAGGAGGTGAAAGACCAGAGCA |
| IRF1-R   | TAGCATCTCGGCTGGACTTCGA |
| IRF9-F   | CCACCGAAGTTCCAGGTAACAC |
| IRF9-R   | AGTCTGCTCCAGCAAGTATCGG |
| IFIT1-F  | GCCTTGCTGAAGTGTGGAGGAA |
| IFIT1-R  | ATCCAGGCGATAGGCAGAGATC |
| Villin-F | GCTGCTCTACACCTACCTCATC |
| Villin-R | TTCTGGTCCAGGATGACGGCTT |
| Muc-2 F  | ACTCTCCACACCCAGCATCATC |
| Muc-2 R  | GTGTCTCCGTATGTGCCGTTGT |
| hCHGA-F  | TGACCTCAACGATGCATTTT   |
| hCHGA-R  | CTGTCCTGGCTCTTCTGCTC   |
